# Supplementary material
Source: ML conference proceedings conference paper supplement (https://openreview.net/forum?id=dOISCbmkmG)
Supplement: supplementary_material [file Reviewer Analysis.pdf › Reviewer Analysis.pdf]

## A REVIEWER ANALYSIS

| model            | Full Set<br>Acc | Hand Annotated<br>Acc | Change  | HITL Generated<br>Acc | Change | Multi Image<br>Acc | Change   | Single Image<br>Acc | Change |
|------------------|-----------------|-----------------------|---------|-----------------------|--------|--------------------|----------|---------------------|--------|
| GPT-o4-mini      | 0.52            | 0.53                  | (0.7%)  | 0.60                  | (7.5%) | 0.28               | (-24.3%) | 0.58                | (5.8%) |
| GPT-5 Mini       | 0.52            | 0.50                  | (-2.0%) | 0.59                  | (6.8%) | 0.32               | (-19.5%) | 0.57                | (4.7%) |
| GPT-5            | 0.49            | 0.52                  | (2.3%)  | 0.55                  | (5.5%) | 0.30               | (-19.7%) | 0.54                | (4.7%) |
| GPT-4.1          | 0.45            | 0.47                  | (2.1%)  | 0.52                  | (7.0%) | 0.21               | (-24.2%) | 0.51                | (5.8%) |
| GPT-4o           | 0.41            | 0.41                  | (0.2%)  | 0.48                  | (7.5%) | 0.17               | (-24.0%) | 0.46                | (5.7%) |
| GPT-5 Nano       | 0.37            | 0.35                  | (-2.1%) | 0.44                  | (7.1%) | 0.17               | (-20.1%) | 0.42                | (4.8%) |
| Claude Opus 4    | 0.28            | 0.36                  | (7.9%)  | 0.31                  | (3.0%) | 0.10               | (-17.6%) | 0.32                | (4.2%) |
| Qwen2 2B         | 0.26            | 0.23                  | (-3.4%) | 0.33                  | (6.5%) | 0.09               | (-17.1%) | 0.30                | (4.1%) |
| Claude Sonnet 4  | 0.25            | 0.34                  | (9.2%)  | 0.27                  | (2.4%) | 0.08               | (-17.0%) | 0.29                | (4.1%) |
| Claude 3.5 Haiku | 0.22            | 0.32                  | (9.6%)  | 0.24                  | (1.3%) | 0.09               | (-13.6%) | 0.26                | (3.5%) |
| Llama-3 11B      | 0.21            | 0.25                  | (4.0%)  | 0.24                  | (2.7%) | 0.09               | (-12.5%) | 0.24                | (3.0%) |
| Pixtral 12B      | 0.16            | 0.24                  | (7.8%)  | 0.16                  | (0.5%) | 0.06               | (-9.8%)  | 0.18                | (2.3%) |
| LLaVA-Next 72B   | 0.14            | 0.20                  | (6.3%)  | 0.16                  | (2.0%) | 0.01               | (-12.7%) | 0.17                | (3.0%) |
| LLaVA-Next 34B   | 0.10            | 0.15                  | (4.9%)  | 0.12                  | (1.3%) | 0.01               | (-9.1%)  | 0.13                | (2.2%) |
| LN 7B (Mistral)  | 0.10            | 0.13                  | (3.0%)  | 0.11                  | (1.3%) | 0.03               | (-7.1%)  | 0.12                | (1.7%) |
| LN 7B (Vicuna)   | 0.08            | 0.14                  | (5.4%)  | 0.09                  | (0.5%) | 0.01               | (-7.2%)  | 0.10                | (1.7%) |
| LN 13B (Vicuna)  | 0.08            | 0.10                  | (2.6%)  | 0.09                  | (1.5%) | 0.01               | (-7.2%)  | 0.10                | (1.7%) |
| Phi-3.5 Vision   | 0.05            | 0.04                  | (-0.9%) | 0.06                  | (0.7%) | 0.04               | (-1.3%)  | 0.05                | (0.3%) |

Table 3: MapQA Subcategory Accuracy (Part 1). LLaVa-Next is abbreviated as LN for spacing. Human-in-the-Loop is abbreviated as HITL.

| model            | Military |         | Natural World |         | Urban |         | Aviation |          |
|------------------|----------|---------|---------------|---------|-------|---------|----------|----------|
|                  | Acc      | Change  | Acc           | Change  | Acc   | Change  | Acc      | Change   |
| GPT-o4-mini      | 0.64     | (11.2%) | 0.51          | (-1.4%) | 0.64  | (11.1%) | 0.30     | (-22.4%) |
| GPT-5 Mini       | 0.61     | (9.6%)  | 0.52          | (0.2%)  | 0.57  | (5.1%)  | 0.33     | (-19.1%) |
| GPT-5            | 0.59     | (10.0%) | 0.45          | (-4.5%) | 0.61  | (11.6%) | 0.32     | (-17.5%) |
| GPT-4.1          | 0.57     | (12.0%) | 0.42          | (-2.7%) | 0.52  | (6.9%)  | 0.23     | (-21.7%) |
| GPT-4o           | 0.52     | (11.7%) | 0.38          | (-2.2%) | 0.46  | (5.7%)  | 0.19     | (-21.2%) |
| GPT-5 Nano       | 0.45     | (7.7%)  | 0.41          | (3.9%)  | 0.42  | (4.8%)  | 0.18     | (-18.9%) |
| Claude Opus 4    | 0.34     | (6.0%)  | 0.27          | (-1.1%) | 0.47  | (19.4%) | 0.13     | (-14.8%) |
| Qwen2 2B         | 0.34     | (8.3%)  | 0.27          | (0.4%)  | 0.33  | (6.7%)  | 0.09     | (-17.4%) |
| Claude Sonnet 4  | 0.31     | (6.2%)  | 0.23          | (-1.6%) | 0.44  | (18.8%) | 0.10     | (-14.6%) |
| Claude 3.5 Haiku | 0.28     | (5.4%)  | 0.21          | (-0.9%) | 0.39  | (17.1%) | 0.10     | (-12.1%) |
| Llama-3 11B      | 0.29     | (7.6%)  | 0.15          | (-5.7%) | 0.33  | (11.7%) | 0.09     | (-12.0%) |
| Pixtral 12B      | 0.22     | (6.5%)  | 0.08          | (-7.6%) | 0.33  | (16.9%) | 0.06     | (-9.4%)  |
| LLaVA-Next 72B   | 0.19     | (5.4%)  | 0.11          | (-2.8%) | 0.32  | (18.0%) | 0.02     | (-11.7%) |
| LLaVA-Next 34B   | 0.14     | (3.7%)  | 0.08          | (-2.2%) | 0.24  | (13.8%) | 0.02     | (-8.1%)  |
| LN 7B (Mistral)  | 0.13     | (2.6%)  | 0.09          | (-0.5%) | 0.20  | (10.5%) | 0.03     | (-6.9%)  |
| LN 7B (Vicuna)   | 0.11     | (2.8%)  | 0.06          | (-2.7%) | 0.24  | (15.5%) | 0.02     | (-6.5%)  |
| LN 13B (Vicuna)  | 0.11     | (2.7%)  | 0.07          | (-0.7%) | 0.18  | (10.2%) | 0.01     | (-6.7%)  |
| Phi-3.5 Vision   | 0.05     | (-0.3%) | 0.08          | (3.0%)  | 0.02  | (-3.3%) | 0.04     | (-1.2%)  |

Table 4: MapQA Subcategory Accuracy (Part 2). LLaVa-Next is abbreviated as LN for spacing. Human-in-the-Loop is abbreviated as HITL.
